# Supplementary material for: Magnetic nanoparticle - indium phthalocyanine conjugate embedded in electrospun fiber for photodynamic antimicrobial chemotherapy and photodegradation of methyl red
Source: PubMed Central journal article supplement — Heliyon. 2019 Aug 24;5(8):e02352. doi: 10.1016/j.heliyon.2019.e02352 (PMC6716351; doi:10.1016/j.heliyon.2019.e02352), 2019-08-24
Supplement: mmc1.pdf [file mmc1.pdf]

## Supporting information

**Magnetic nanoparticle - indium phthalocyanine conjugate embedded in electrospun fiber for photodynamic antimicrobial chemotherapy and photodegradation of methyl red**

Azole Sindelo and Tebello Nyokong\*

*Centre for Nanotechnology Innovation, Department of Chemistry, Rhodes University, Grahamstown 6140, South Africa.*

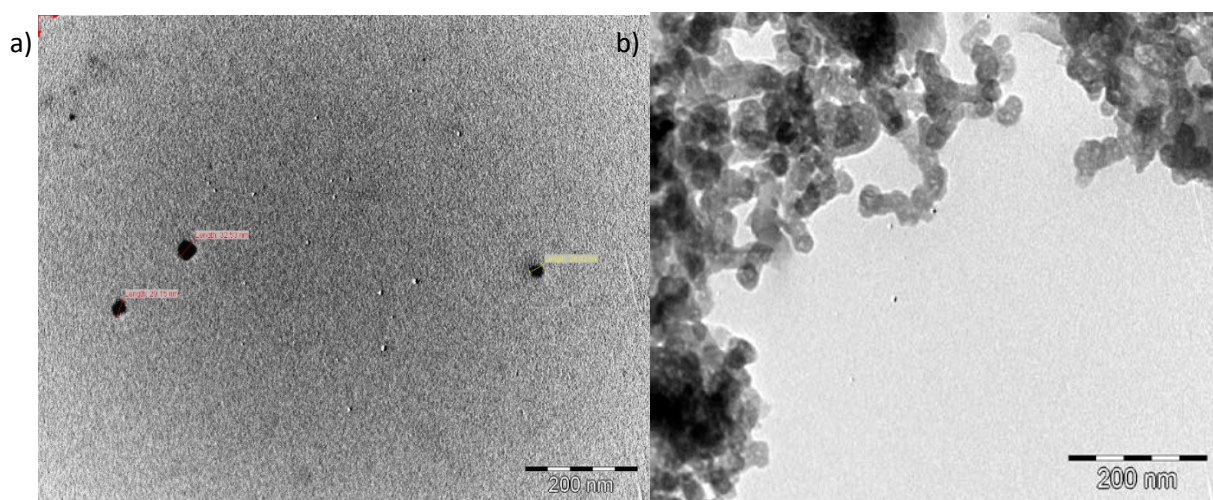

**Figure S1:** TEM images of a) MNP-NH<sub>2</sub> and (b) MNP-ClInOCPc conjugate.

(A)

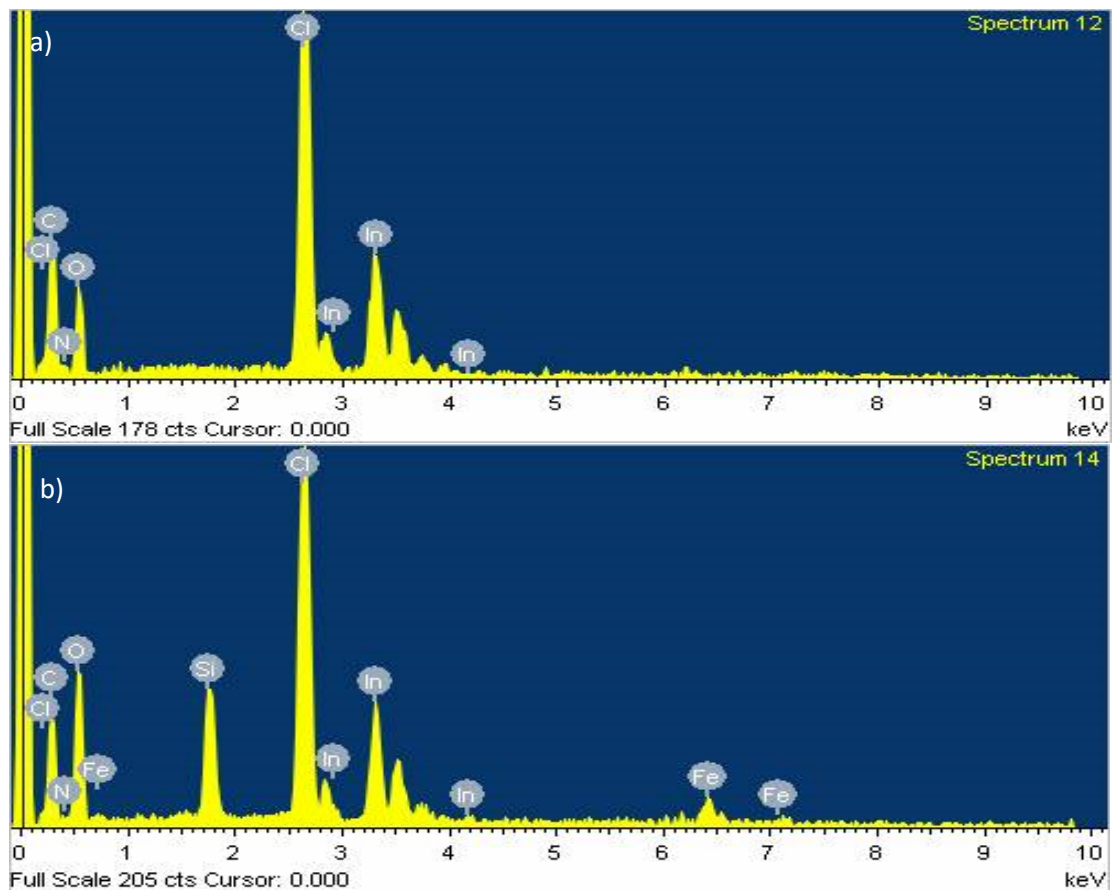

(B)

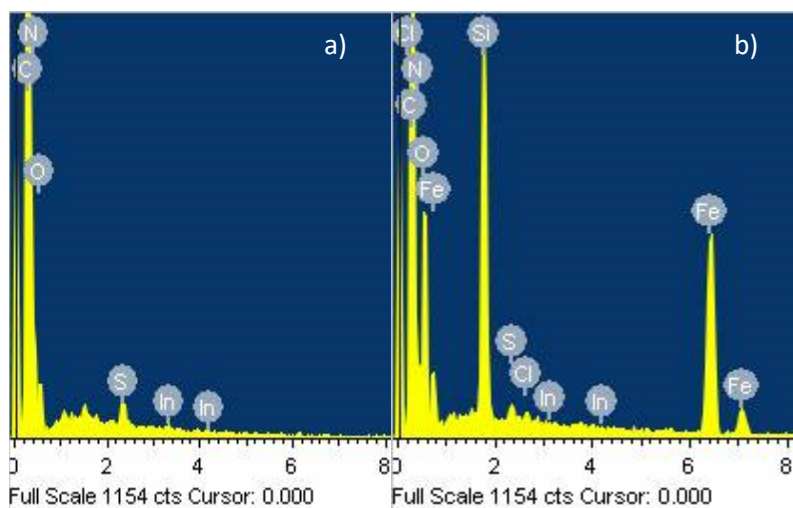

**Figure S2:** EDX data for illustrating the composition (A) a) ClInOCPc and b) MNP-ClInOCPc conjugate and (B) a) ClInOCPc/PAN b) MNP-ClInOCPc/PAN

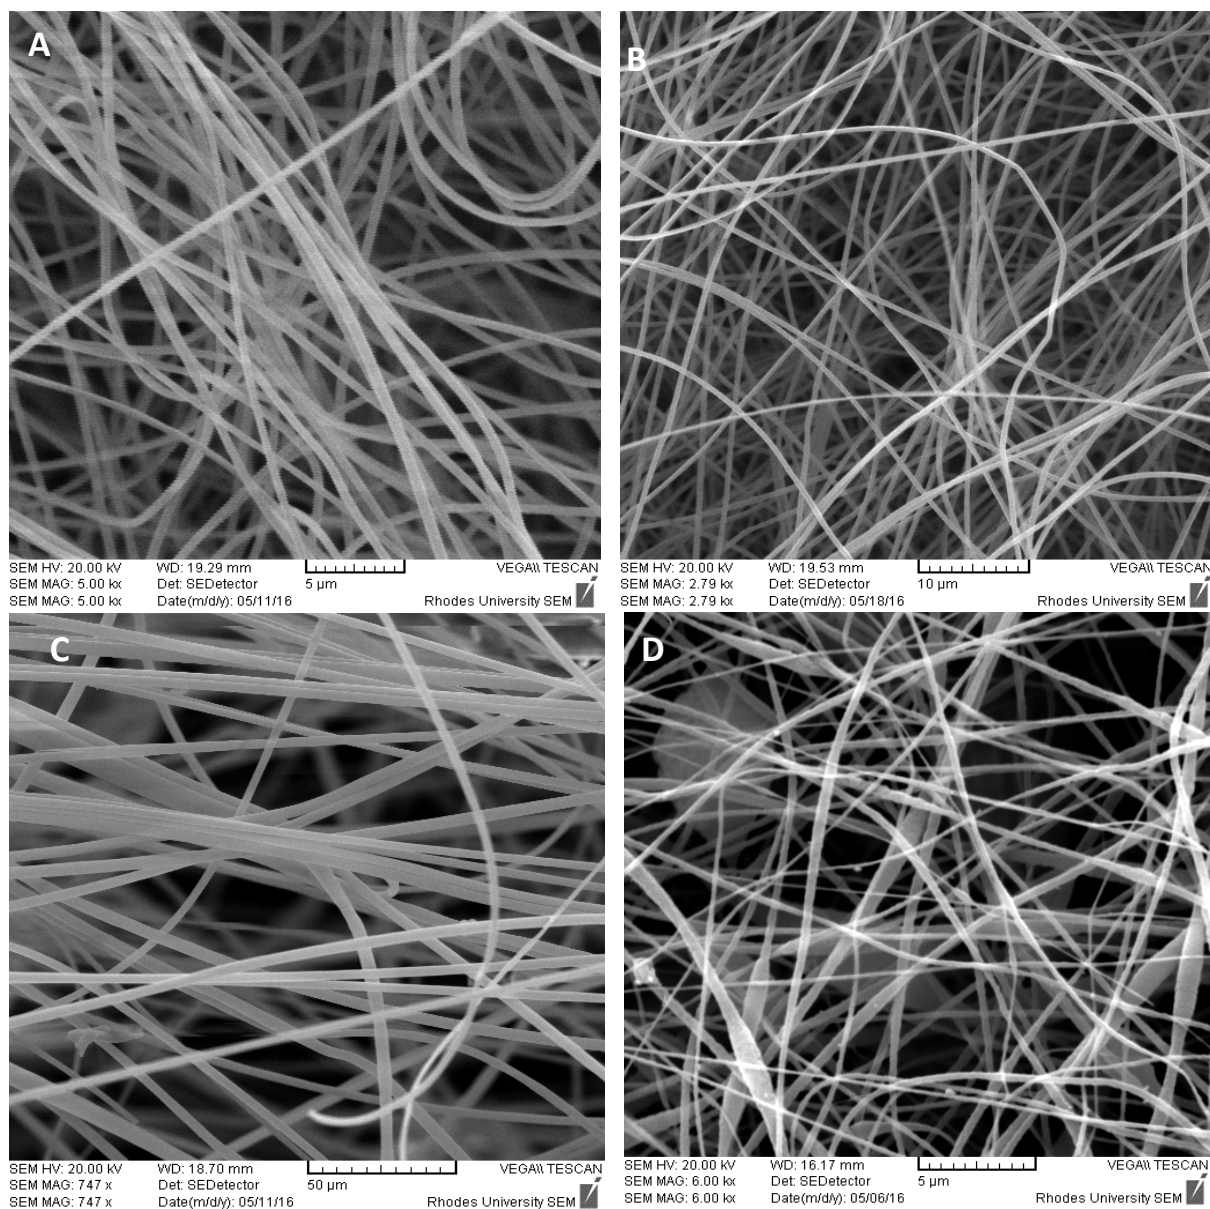

**Figure S3:** SEM images of the nanofibers mats of A. PAN, B. ClInOCPc/PAN, C. MNP-ClInOCPc/PAN, and D. Re-used MNP-ClInOPc/PAN.

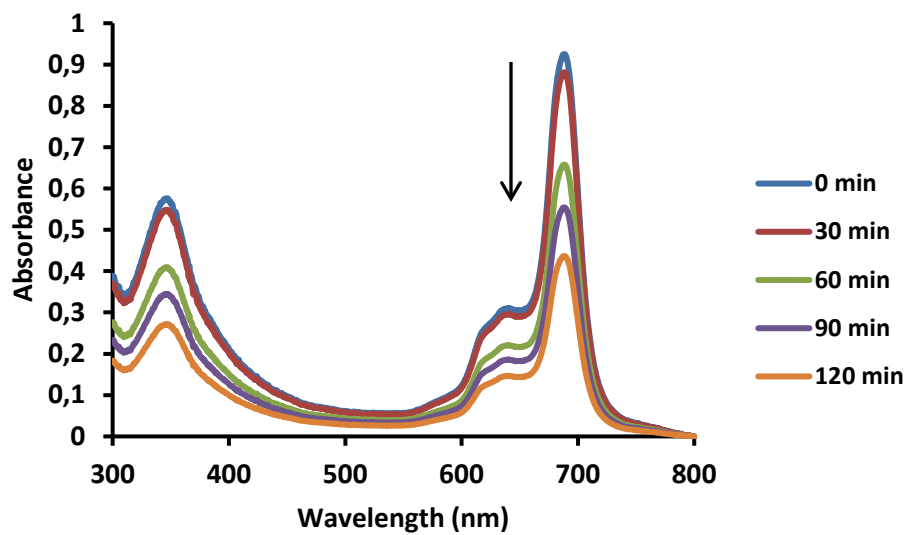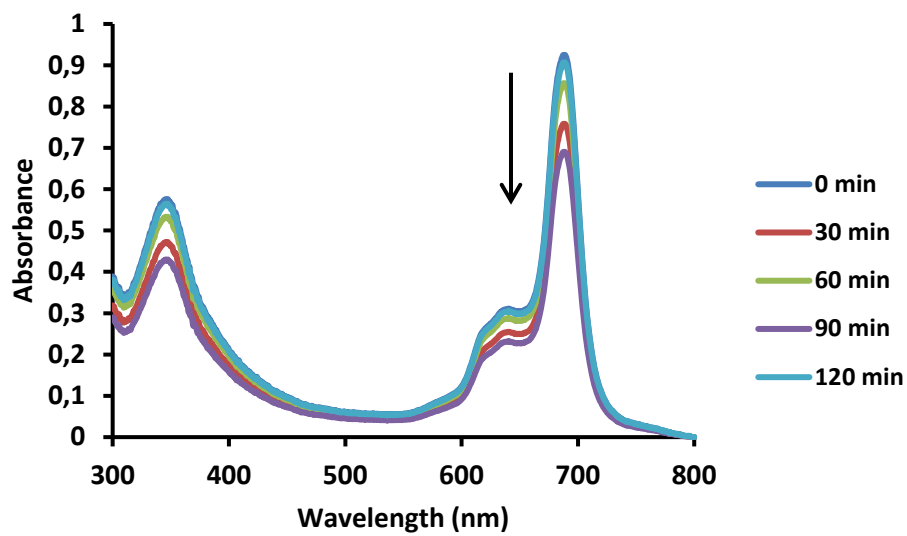

**Figure S4:** UV-Vis spectra during irradiation for PACT (A) ClInOCPc and (B) MNP-ClInOCPc in 0.2 % DMF in PBS.
